# Supplementary material for: Reaction of trimethylaluminium with main group hydroxides: a non-hydrolysis route to methylalumoxane†
Source: Royal Society of Chemistry journal article supplement (doi:10.1039/b104578b), 2001-01-01
Supplement: b104578b.doc [file b104578b.doc]

Reaction of Trimethylaluminum with Main Group Hydroxides: A Non-Hydrolysis Route to Methylalumoxane

Stephen J. Obrey and Andrew R. Barron*

*Department of Chemistry and Center for Nanoscale Science and Technology,*

*Rice University, Houston, Texas 77005*

Supplementary Material

**Reaction of AlMe3 with Ph3SnOH.** To a solution of Ph3SnOH (2.54 g, 6.92 mmol) in toluene (50 mL) was added dropwise a solution of AlMe3 (0.500g, 6.94 mmol) in toluene (50 mL) over a period of an hour. The reaction mixture was stirred for 6 h. after which the solvent was removed under vacuum. Analysis by 1H and 13C NMR showed the presence of methyl alumoxane and Ph3SnCH3. Isolation of Ph3SnCH3 is accomplished by cooling the reaction mixture (prior to removal of the solvent) and adding water (20 mL). The reaction mixture was then warmed to room temperature over a period of an hour and stirred for 2 hours. The organic layer was separated and the aqueous layer was extracted with Et2O (3 x 50 mL). The solvent was removed under vacuum. The resulting material was weighed and analyzed by 1H and 13C NMR. Yield: 2.32 g, 92%. 1H NMR:  7.59 (6H, m, C6H5), 7.20 (9H, m, C6H5), 0.60 (3H, s, Sn-CH3). 13C NMR:  139.3 (Sn-C), 137.1 (*o*-CH), 129.1 (*p*-CH), 128.8, (*m*-CH), -10.78 (Sn-CH3).

**Reaction of AlMe3 with Ph3PbOH.** Performed in a similar manner to the reaction described above, using Ph3PbOH (3.15 g, 6.92 mmol). Yield: 2.72 g, 87%. 1H NMR:  7.10 (15H, m, C6H5), 1.30 (3H, s, Pb-CH3). 13C NMR:  149.6 (Sn-C), 137.1 (*o*-CH), 129.2 (*p*-CH), 128.3 (*m*-CH), 0.2 (Pb-CH3).

**[Me2Al(-OCPh3)]2.** To a solution of AlMe3 (1.00g, 13.88 mmol) in toluene (50 mL), at –15 °C, was added dropwise a solution of Ph3COH (3.545 g, 13.62 mmol) in toluene (50 mL) over a period of 30 minutes. The cloudy white reaction mixture was warmed to room temperature and stirred for 6 h. after which the reaction mixture turns clear and colorless, The solvent was removed under vacuum and redissolved in CH2Cl2 (25 mL). After filtering, the solution was concentrated and cooled to –33 °C. The resulting clear colorless crystalline material was collected by filtration. Yield: 78 %. Mp: 160 °C (dec.).MS (EI,%): *m/z*: 617 (M+ - Me, 75). IR (cm-1): 1157 (s), 1086 (s), 1070 (m), 948 (s), 906 (s), 832 (w), 791 (s), 742 (m), 702 (m), 689 (w). 1H NMR:  7.53 (6H, m, *o*-CH), 7.15 (6H, m, *m*-CH), 7.05 (2H, m, *p*-CH), -0.81 (6H, s, Al-CH3). 13C NMR:  144.7 (OCC) 131.1 (*o*-CH), 128.8 (*p*-CH), 128.4, (*m*-CH). 89.90 (OC), -3.39 (Al-CH3). 27Al NMR**:**  147 (W1/2 = 4,800).

**[Me2Al(-OSiPh3)]2 (1).** Prepared in the same manner as [Me2Al(-OCPh3)]2, but using Ph3SiOH (3.80 g, 13.8 mmol) and AlMe3 (1.00 g, 13.88 mmol). Yield: 85 %. Mp: 201 - 204 °C. MS (EI,%): *m/z*: 649 (M+ - Me, 100), 634 (M+ - 2 Me, 55). IR (cm-1): 1961 (w), 1895 (w), 1828 (w), 1580 (w), 1428 (m), 1193 (m), 1112 (s), 992 (w), 812 (s). 1H NMR:  7.62 (12H, m, *o*-CH), 7.15 (18H, m, *m*-, *p*-CH), -0.63 (12H, s, Al-CH3). 13C NMR:  136.5 (Si-C), 133.3 (*o*-CH), 130.9 (*p*-CH), 128.3 (*m*-CH), -6.6 (Al-CH3). 27Al NMR:  138 (W1/2 = 9,800 Hz).

**[Me2Al(-OGePh3)]2 (2).** Prepared in the same manner as [Me2Al(-OCPh3)]2, but using Ph3GeOH (0.440 g, 1.37 mmol) and AlMe3 (0.100 g, 1.38 mmol). Yield: 52 %. MS (EI,%): *m/z*: 739 (M+ - Me, 100), 724 (M+ - 2 Me, 45). IR (cm-1): 1948 (m), 1845 (w), 1728 (w), 1145 (m), 928 (s), 914 (m). 1H NMR:  7.72 (12H, m, *o*-CH), 7.15 (18H, m, *m*-, *p*-CH), -0.59 (12 H, s, Al-CH3). 13C NMR:  135.4 (Ge-C), 133.7 (*o*-CH), 131.2 (*p*-CH), 128.1 (*m*-CH), -7.2 (Al-CH3). 27Al NMR:  140 (W1/2 = 7,900 Hz).

**Low Temperature Reaction of AlMe3 with Ph3COH.** To a solution of AlMe3 (1.00g, 13.88 mmol) in toluene (50 mL), at –78 °C, was added a solution of Ph3COH (3.545 g, 13.62 mmol) in toluene (50 mL), after which the formation of a yellow color was observed. The reaction was held at –78 °C for 48 hours. Samples (*ca*. 3 mL) were removed from the reaction mixture after 1, 16 and 48 hours. The samples were allowed to warm to room temperature and solvent was removed under vacuum. Analysis by 1H NMR showed the formation of methyl alumoxane and Ph3CMe. 1H NMR: ᦜᦜ3⨂3Ⰲ3⸂3⸂3〈3。3な3ᦜᦜ3⨂3Ⰲ3⸂3⸂3〈3。3な3。ᦜᦜᦜ3⨂ᦜⰀⰀ3ⰀⰀ3ⰀⰀⰀ3Ⰰ3⸀3⸀ⰀⰀ3Ⰰ3⸀3Ⰰ3Ⰰ3⸀3⸀3⸀3⸀3⸀3⸀3⸀3⸀ⰀⰀ3ⰀⰀⰀ3ⰀⰀⰀ3Ⰰ3⸀3⸀3⸀3⸀3⸀3⸀3⸀3⸀3⸀3⸀3⸀3⸀3⸀3⸀3⸀3⸀3⸀3⸀3⸀3⸀3⸀3⸀3⸀3⸀3⸀3⸀3⸀3⸀3⸀3⸀3⸀3⸀3⸀3⸀3⸀3⸀3⸀3⸀3⸀3⸀3⸀3⸀3⸀3⸀3⸀3⸀3⸀3⸀3ⰀⰀ3Ⰰ3⸀3⸀3⸀3⸀3⸀3⸀3⸀3⸀3⸀3⸀3⸀3⸀3⸀3⸀3⸀3⸀3⸀3⸀3⸀3⸀3⸀3⸀3⸀3⸀3⸀3⸀3⸀3⸀3⸀3⸀3⸀3⸀3⸀3⸀3⸀3⸀3⸀3⸀3⸀3⸀3⸀3⸀3⸀3⸀3⸀3⸀3⸀3⸀3⸀3⸀3⸀3⸀3⸀3⸀3⸀3⸀3⸀3⸀3⸀3⸀3⸀3⸀3⸀3⸀3⸀3⸀3⸀3⸀3⸀3⸀3⸀3⸀3⸀3⸀3⸀3⸀3⸀3⸀3⸀3⸀3⸀3⸀3⸀3⸀3⸀3⸀3⸀3ﬀⰀⰀ4ⰀⰀ4Ⰰ4⸀4⸀4⸀4⸀4⸀4⸀4⸀4⸀4⸀4⸀4⸀4⸀4⸀4⸀4⸀4⸀4⸀4⸀4Ⰰ4Ⰰ4⸀4⸀4⸀4⸀4⸀4⸀4⸀4⸀4⸀4⸀4⸀4⸀4⸀4⸀4⸀4⸀4⸀4⸀4⸀4⸀4⸀4⸀4⸀4⸀4⸀4⸀4⸀4⸀4⸀4⸀4ⰀⰀ4Ⰰ4⸀4⸀Ⰰ4Ⰰ4Ⰰ4⸀4⸀4⸀4⸀4⸀4⸀4⸀4⸀4⸀4⸀4⸀4⸀4⸀4⸀4⸀4⸀4⸀4⸀4⸀4⸀4⸀4⸀4⸀4⸀4⸀4⸀4⸀4⸀4⸀4⸀4⸀4⸀4⸀4⸀4⸀4⸀4⸀4⸀ⰀⰀ4Ⰰ4⸀4⸀ⰀⰀ4Ⰰ4⸀4⸀4⸀4⸀4⸀4ⰀⰀ4Ⰰ4⸀4⸀4⸀4⸀4⸀4⸀4⸀ⰀⰀ4Ⰰ4⸀ⰀⰀ4Ⰰ4⸀4⸀4⸀4⸀4⸀ⰀⰀ4ⰀⰀ4Ⰰ4⸀4⸀4⸀4⸀4⸀4⸀4ⰀⰀ4Ⰰ4⸀4⸀4⸀4⸀4⸀4⸀4ⰀⰀ4Ⰰ4Ⰰ4Ⰰ4⸀4⸀4⸀4⸀4⸀4⸀4⸀4ⰀⰀ4Ⰰ4⸀4⸀4⸀4⸀4⸀4⸀4⸀ⰀⰀ4ⰀⰀⰀⰀⰀ4Ⰰ4⸀4⸀4⸀4⸀4⸀4⸀4ⰀⰀ4Ⰰ4⸀4⸀4⸀4⸀4⸀4⸀4⸀4⸀4ⰀⰀⰀⰀⰀ4Ⰰ4⸀4⸀4⸀4⸀4⸀4⸀4ⰀⰀ4Ⰰ4⸀4⸀4⸀4⸀4⸀4⸀4⸀4⸀4ⰀⰀⰀ4ⰀⰀ4Ⰰ4Ⰰ4⸀4⸀Ⰰ⸀⸀4⸀4　4　4　⸀⸀4⸀4　4　4　4⸀⸀⸀⸀4⸀4　4　4　4　⸀⸀⸀⸀4⸀4　4　4　4　⸀⸀⸀⸀4⸀4　4　4　4　⸀⸀4⸀4　4　4　4　4⸀⸀⸀⸀⸀⸀4⸀4　4　4　⸀⸀4⸀4⸀⸀⸀⸀4⸀⸀⸀⸀4⸀4　4　4　4　4　4　4。⸀4⸀4　4　4　4　4　⸀⸀4⸀⸀⸀4⸀4　4　4　4　⸀⸀4⸀4　⸀4⸀4　4　4　4　4　4　4。4⸀⸀4⸀⸀⸀4⸀⸀⸀4⸀4　4　4　4　4　4　4。4ýûýý444444444444444444444444444444444444444444444444444444444⸀⸀4⸀4　4　4　4　4　4　4。4ýûýý44444444444444444444444444444444444444444444444444444444444444444444444444444444444444444444⸀4⸀4　4　4　4　4　4　4。4ýûýý444444444444444444444444444444444444444444444444444444444444444444444444444444444444444444444444444444444444444444444444⸀4⸀4　4　⸀⸀4⸀4　4　4　4　4　4　4。4ýûýý44444444444444444444444444444444⸀4⸀⸀4⸀4　4　4　4　4　4　4。4ýûýý4444⸀⸀4⸀4⸀⸀4⸀4　4　4⸀⸀⸀⸀4⸀⸀⸀4⸀4⸀4　4　4　⸀4⸀4　4⸀4⸀4⸀⸀⸀⸀4⸀⸀4⸀4　4　4　4⸀4⸀4⸀⸀4⸀⸀4⸀4⸀4　4　4⸀⸀⸀⸀4⸀⸀⸀4⸀4　4　4　4⸀⸀4⸀4　4　4　4⸀⸀⸀⸀4⸀4　4　4　4　⸀⸀⸀⸀4⸀4　4　4　4　뀟⺂뀠䇆뀡܈뀢܈連֠뀟⺂뀠
